## CORRECTION

# Correction: Human indole(ethyl)amine-N-methyltransferase (hINMT) catalyzed methylation of tryptamine, dimethylsulfide and dimethylselenide is enhanced under reducing conditions - A comparison between 254C and 254F, two common hINMT variants

The *PLOS ONE* Staff

There are errors in the Funding statement. The publisher apologizes for the errors. The correct Funding statement is as follows: This study was funded by the School of Medicine and Public Health Grant # UWSMPHPRJ82KR.

In the Author Contributions, Brian Torres (BT) should be listed as one of the persons who wrote the paper. The publisher apologizes for the error.

## Reference

1. Torres B, Tyler JS, Satyshur KA, Ruoho AE (2019) Human indole(ethyl)amine-N-methyltransferase (hINMT) catalyzed methylation of tryptamine, dimethylsulfide and dimethylselenide is enhanced under reducing conditions—A comparison between 254C and 254F, two common hINMT variants. *PLoS ONE* 14(7): e0219664. <https://doi.org/10.1371/journal.pone.0219664> PMID: 31310642

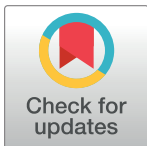

## OPEN ACCESS

**Citation:** The *PLOS ONE* Staff (2019) Correction: Human indole(ethyl)amine-N-methyltransferase (hINMT) catalyzed methylation of tryptamine, dimethylsulfide and dimethylselenide is enhanced under reducing conditions - A comparison between 254C and 254F, two common hINMT variants. *PLoS ONE* 14(10): e0223546. <https://doi.org/10.1371/journal.pone.0223546>

**Published:** October 1, 2019

**Copyright:** © 2019 The PLOS ONE Staff. This is an open access article distributed under the terms of the [Creative Commons Attribution License](https://creativecommons.org/licenses/by/4.0/), which permits unrestricted use, distribution, and reproduction in any medium, provided the original author and source are credited.
